# Supplementary material for: One-pot synthesis of sandwich-like reduced graphene oxide@CoNiAl layered double hydroxide with excellent pseudocapacitive properties
Source: Royal Society of Chemistry journal article supplement (doi:10.1039/c5ta02427g), 2015-01-01
Supplement: c5ta02427g1.pdf [file c5ta02427g1.pdf]

## Supporting Information

### One-pot Synthesis of Sandwich-like Reduced Graphene Oxide@CoNiAl Layered Double Hydroxide with Excellent Pseudocapacitive Properties

Peipei Huang, Changyan Cao\*, Yongbin Sun, Shuliang Yang, Fang Wei and Weiguo Song\*

Beijing National Laboratory for Molecular Sciences (BNLMS) & Key Laboratory of Molecular Nanostructure and Nanotechnology, Institute of Chemistry, Chinese Academy of Sciences

Beijing, 100190, People's Republic of China

E-mail: [cyciao@iccas.ac.cn](mailto:cyciao@iccas.ac.cn), [wsong@iccas.ac.cn](mailto:wsong@iccas.ac.cn).

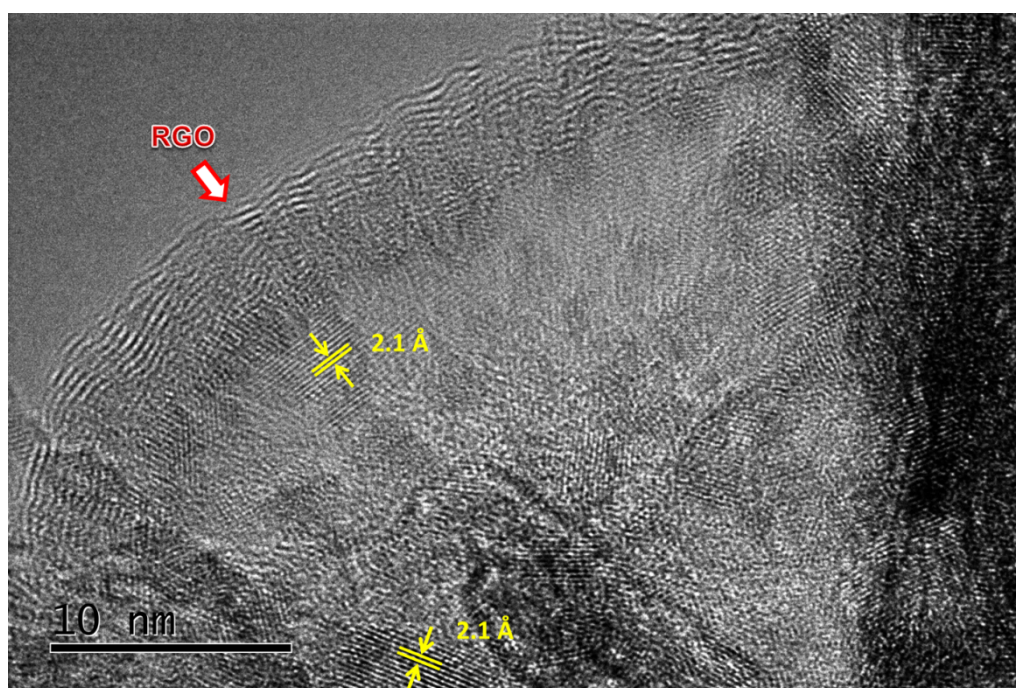

Fig. S1 HR-TEM image of RGO(25)@CoNiAl-LDH

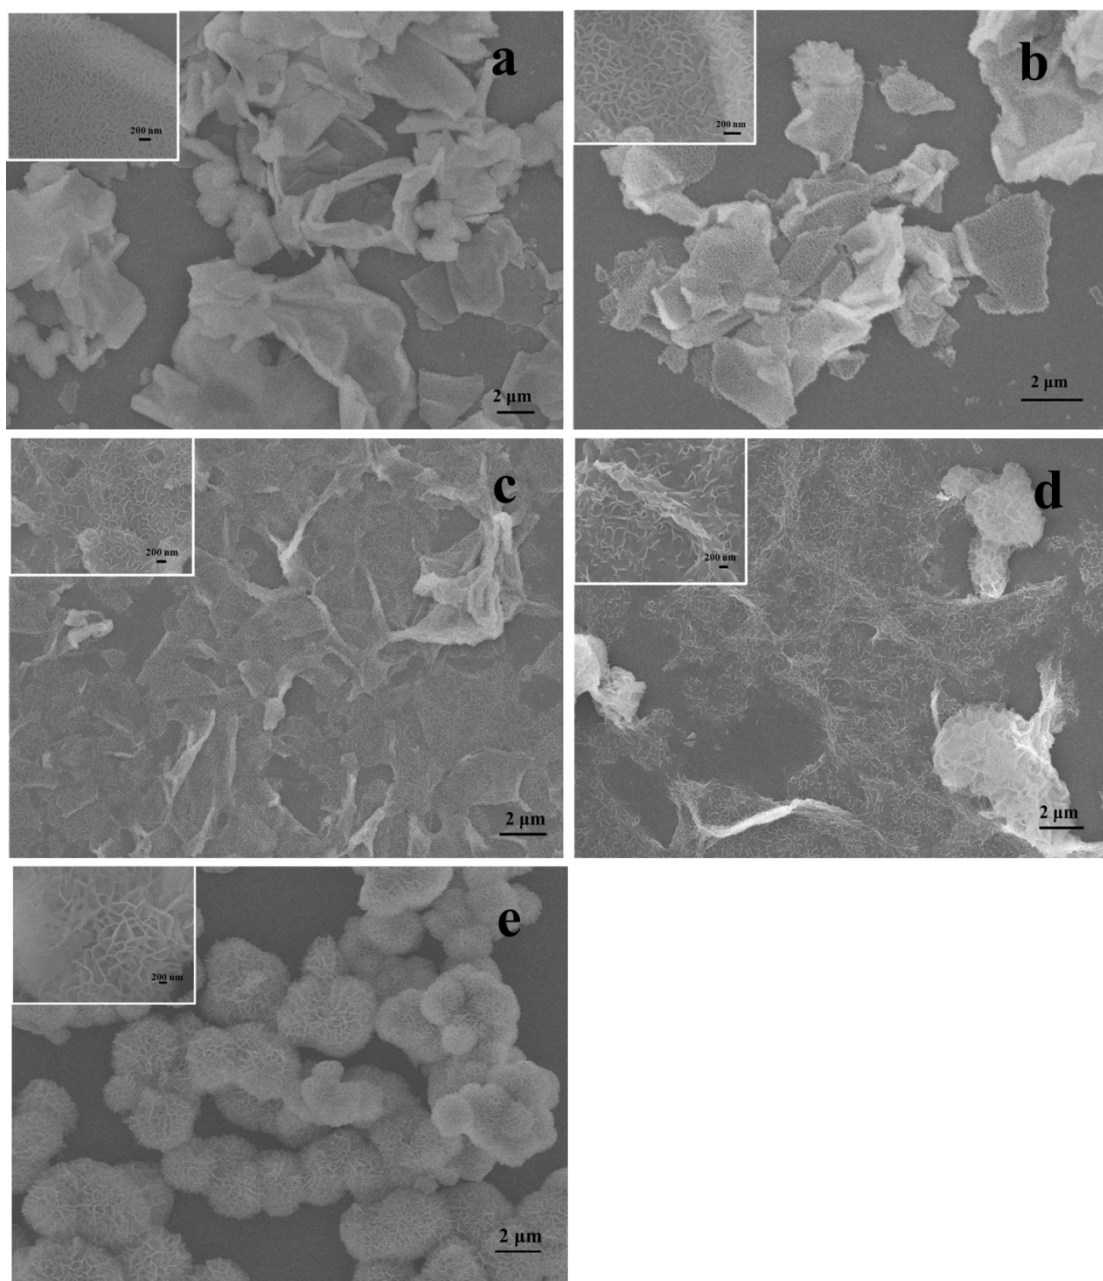

**Fig. S2.** SEM images of RGO(X)@CoNiAl-LDH (a) X=12.5, (b) X=25, (c) X=35, (d) X=50 and (e) X=0

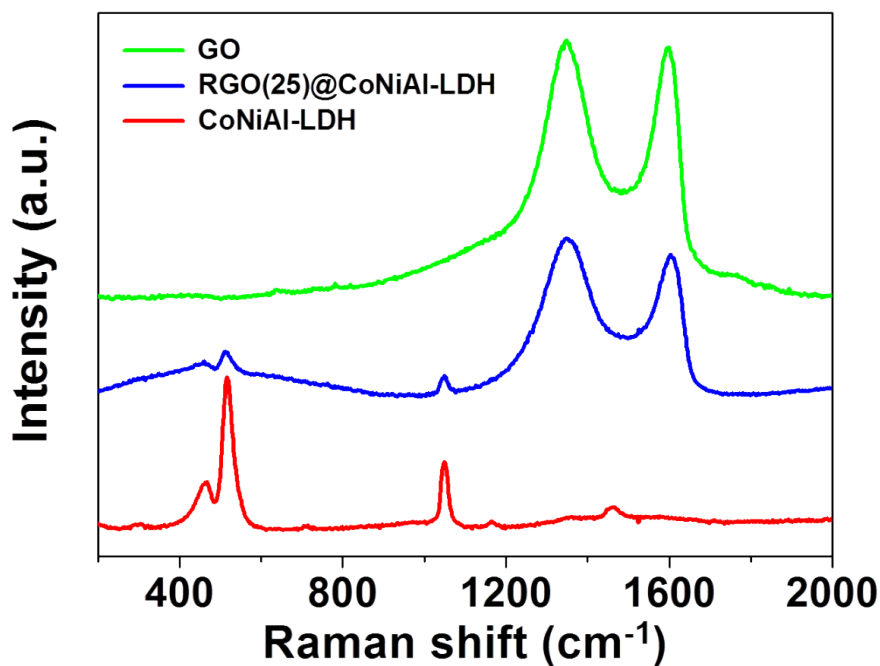

**Fig. S3** Raman spectra of GO, RGO(25)@CoNiAl-LDH and CoNiAl-LDH

**Table S1** Specific capacitance comparisons of RGO(25)@CoNiAl-LDH in this study with other materials for pseudocapacitors

| Material                                                                                    | Current density/<br>A/g | Specific capacitance/<br>F/g | Reference  |
|---------------------------------------------------------------------------------------------|-------------------------|------------------------------|------------|
| RGO(25)@CoNiAl-LDH                                                                          | 10                      | 1360                         | This study |
| Hollow layered double hydroxide microspheres                                                | 2                       | 735                          | 17         |
| Sandwich-type three-dimensional layered double hydroxide nanosheet array/graphene composite | 10.71                   | 984                          | 29         |
| 3D porous layered double hydroxides grown on graphene                                       | 6                       | 755.6                        | 37         |
| MWCNT-doped NiCoAl-layered double hydroxide nanosheets                                      | 10                      | 597                          | 40         |
| Graphene/CoAl-layered double hydroxide composites                                           | 10                      | 516.8                        | 46         |
| Flower-like Fe <sub>3</sub> O <sub>4</sub> @C@layered double hydroxide (LDH) composite      | 10                      | 406                          | 47         |
